# Supplementary material for: Quantitative Analysis of the KSHV Transcriptome Following Primary Infection of Blood and Lymphatic Endothelial Cells
Source: MDPI journal article supplement (doi:10.3390/pathogens6010011), 2017-03-19
Supplement: s1 [file s1]

**Table S14: Significance of promoter enrichment in gene regulatory modules<sup>1</sup>**

| Promoter element <sup>2</sup> | Cluster 1             | Cluster 2            | Cluster 3 | Cluster 4            | Cluster 5                         |
|-------------------------------|-----------------------|----------------------|-----------|----------------------|-----------------------------------|
| TATTTAAA                      | P=0.0358              | P=0.1044             | P=0.3534  | P=0.5341             | P=0.0962<br>(OR 2.3) <sup>3</sup> |
| TATTAAA                       | P=0.6833              | P=0.1902<br>(OR 2.6) | P=0.2025  | P=0.2062             | P=0.0509<br>(OR 3.6)              |
| TATATA                        | P=1                   | P=1                  | P=0.4082  | P=0.3875             | P=0.5293                          |
| TATAA                         | P=0.04141<br>(OR 3.9) | P=0.2056             | P=0.684   | P=0.6856             | P=0.7504                          |
| TATA                          | P=0.6684              | P=0.0228<br>(OR 6.1) | P=0.6376  | P=0.347              | P=0.1515                          |
| TAAAT                         | P=1                   | P=1                  | P=1       | P=0.0703<br>(OR 4.8) | P=0.4159                          |
| Other                         | P=0.5276              | P=1                  | P=1       | P=0.7325             | P=0.6083                          |

<sup>1</sup> Fisher's exact test – see Materials and Methods

<sup>2</sup> see Table 2 for promoter elements

<sup>3</sup>OR = Odds Ratio greater than 2.0 are shown
