# Supplementary material for: Quantitative Analysis of the KSHV Transcriptome Following Primary Infection of Blood and Lymphatic Endothelial Cells
Source: MDPI journal article supplement (doi:10.3390/pathogens6010011), 2017-03-19
Supplement: s1 [file s1]

| S6 Table: Quantitation of sense and antisense transcripts <sup>1</sup> |                           |              |               |               |
|------------------------------------------------------------------------|---------------------------|--------------|---------------|---------------|
| ORFs <sup>2</sup>                                                      | BEC-K1 (TPM) <sup>3</sup> | LEC-K1 (TPM) | TIME-K1 (TPM) | BCBL(K) (TPM) |
| K2 total <sup>4</sup>                                                  | 4574                      | 5412         | 22665         | 27961         |
| K2 AS <sup>5</sup>                                                     | 13                        | 14           | 9             | 17            |
| K2 Sense <sup>6</sup>                                                  | 4561                      | 5397         | 22656         | 27944         |
| % sense of total                                                       | 99.7%                     | 99.7%        | 100.0%        | 99.9%         |
|                                                                        |                           |              |               |               |
| K4 total                                                               | 16998                     | 16453        | 15550         | 22268         |
| K4 AS <sup>7</sup>                                                     | 8                         | 12           | 0             | 14            |
| K4 Sense                                                               | 16991                     | 16442        | 15550         | 22255         |
| % sense of total                                                       | 100.0%                    | 99.9%        | 100.0%        | 99.9%         |
|                                                                        |                           |              |               |               |
| DR1 total                                                              | 1095                      | 897          | 320           | 6063          |
| DR1 AS                                                                 | 536                       | 434          | 155           | 2588          |
| DR1 Sense                                                              | 558                       | 462          | 165           | 3475          |
| % sense of total                                                       | 51.0%                     | 51.6%        | 51.4%         | 57.3%         |
|                                                                        |                           |              |               |               |
| DR2 total                                                              | 525                       | 392          | 56            | 4469          |
| DR2 AS                                                                 | 10                        | 2            | 0             | 20            |
| DR2 Sense                                                              | 516                       | 390          | 56            | 4449          |
| % sense of total                                                       | 98.1%                     | 99.5%        | 100.0%        | 99.5%         |
|                                                                        |                           |              |               |               |
| K6 total                                                               | 2793                      | 2351         | 2501          | 13479         |
| K6 AS                                                                  | 1520                      | 1152         | 257           | 1362          |
| K6 Sense                                                               | 1274                      | 1199         | 2243          | 12117         |
| % sense of total                                                       | 45.6%                     | 51.0%        | 89.7%         | 89.9%         |
|                                                                        |                           |              |               |               |
| 29A total                                                              | 1177                      | 980          | 1329          | 307           |
| 29A AS                                                                 | 1083                      | 901          | 1286          | 234           |
| 29A Sense                                                              | 94                        | 78           | 43            | 73            |
| % sense of total                                                       | 8.0%                      | 8.0%         | 3.3%          | 23.9%         |
|                                                                        |                           |              |               |               |
| 29B total                                                              | 2581                      | 1815         | 817           | 452           |
| 29B AS                                                                 | 2465                      | 1682         | 672           | 315           |
| 29B Sense                                                              | 116                       | 133          | 145           | 137           |
| % sense of total                                                       | 4.5%                      | 7.3%         | 17.8%         | 30.4%         |
|                                                                        |                           |              |               |               |
| ORF50 total                                                            | 1507                      | 1103         | 2317          | 2539          |
| ORF50 AS                                                               | 468                       | 391          | 778           | 1150          |
| ORF50 sense                                                            | 1040                      | 712          | 1540          | 1389          |
| % sense of total                                                       | 69.0%                     | 64.6%        | 66.4%         | 54.7%         |
|                                                                        |                           |              |               |               |
| ORF59 total                                                            | 21245                     | 21902        | 28799         | 14901         |
| ORF59 AS                                                               | 13                        | 8            | 0             | 11            |
| ORF59 sense                                                            | 21232                     | 21894        | 28799         | 14890         |
| % sense of total                                                       | 99.9%                     | 100.0%       | 100.0%        | 99.9%         |
|                                                                        |                           |              |               |               |
| ORF68 total                                                            | 1762                      | 1457         | 1092          | 1199          |
| ORF68 AS                                                               | 1347                      | 1178         | 611           | 750           |
| ORF68 Sense                                                            | 415                       | 279          | 481           | 449           |
| % sense of total                                                       | 23.6%                     | 19.2%        | 44.1%         | 37.4%         |
|                                                                        |                           |              |               |               |
| ORF69 total                                                            | 3624                      | 2917         | 2907          | 2729          |
| ORF69 AS                                                               | 1139                      | 895          | 501           | 493           |
| ORF69 Sense                                                            | 2485                      | 2022         | 2406          | 2236          |
| % sense of total                                                       | 68.6%                     | 69.3%        | 82.8%         | 81.9%         |
|                                                                        |                           |              |               |               |
| K12Aa total                                                            | 2839                      | 2867         | 10792         | 4723          |
| K12Aa AS                                                               | 39                        | 15           | 50            | 384           |
| K12Aa sense                                                            | 2800                      | 2852         | 10742         | 4339          |
| % sense of total                                                       | 98.6%                     | 99.5%        | 99.5%         | 91.9%         |
|                                                                        |                           |              |               |               |
| ORF72 total                                                            | 5176                      | 5457         | 15813         | 3291          |
| ORF72 AS                                                               | 28                        | 30           | 27            | 193           |
| ORF72 sense                                                            | 5148                      | 5427         | 15785         | 3098          |
| % sense of total                                                       | 99.5%                     | 99.4%        | 99.8%         | 94.1%         |
|                                                                        |                           |              |               |               |
| ORF73 total                                                            | 182                       | 160          | 389           | 2130          |
| ORF73 AS                                                               | 37                        | 30           | 25            | 273           |
| ORF73 sense                                                            | 145                       | 130          | 364           | 1857          |
| % sense of total                                                       | 79.7%                     | 81.3%        | 93.5%         | 87.2%         |

<sup>1</sup>Sense and antisense RNA transcripts were quantitated using HTSEQ on RNA reads from RNAseq stranded libraries of single infections of LEC, BEC and TIME endothelial cells and VERO and BCBL-1 cells.

<sup>2</sup>UCDS features used by HTSEQ to quantitate RNAseq reads; see Table 3

<sup>3</sup>TPM=transcripts per million mapped KSHV reads

<sup>4</sup> total number of reads mapping to UCDS feature

<sup>5</sup> number of reads mapping antisense to UCDS feature

<sup>6</sup> number of reads mapping to UCDS feature (sense strand)

<sup>7</sup> a similar lack of reads mapping antisense to the UCDS features of ORFK4.1 and ORFK4.2 was also observed
