# Supplementary material for: Quantitative Analysis of the KSHV Transcriptome Following Primary Infection of Blood and Lymphatic Endothelial Cells
Source: MDPI journal article supplement (doi:10.3390/pathogens6010011), 2017-03-19
Supplement: s1 [file s1]

**S1 Table: Comparison of total and primary transcripts encoding ORFs 6-K3<sup>1</sup>**

| UCDS<br>Feature <sup>2</sup> | LEC-K1-3<br>(TPM) <sup>3</sup> |                      | BEC-K1-3<br>(TPM) |          | TIME-K2-3<br>(TPM) |          | TIME-K1<br>(TPM)   |         | BCBL(K)<br>(TPM) |         | VERO-K<br>(TPM) |         |
|------------------------------|--------------------------------|----------------------|-------------------|----------|--------------------|----------|--------------------|---------|------------------|---------|-----------------|---------|
|                              | Total <sup>4</sup>             | Primary <sup>5</sup> | Total             | Primary  | Total              | Primary  | Total              | Primary | Total            | Primary | Total           | Primary |
| ORF6                         | 4239±12%                       | 4239±12%             | 3997±10%          | 3997±10  | 5367±10%           | 5367±10% | 10639              | 10639   | 1258             | 1258    | 5313            | 5313    |
| ORF7                         | 735±8%                         | 735±8%               | 678±13%           | 678±13%  | 730±8%             | 730±8%   | 1271               | 1271    | 158              | 158     | 462             | 462     |
| ORF8                         | 2132±3%                        | 1397±5%              | 2155±7%           | 1478±5%  | 2181±9%            | 1451±9%  | 2174               | 903     | 959              | 801     | 916             | 455     |
| ORF9                         | 2898±3%                        | 766±5%               | 2996±4%           | 841±6%   | 3025±8%            | 844±6%   | 3521               | 1347    | 1436             | 477     | 1619            | 703     |
| ORF10                        | 3384±4%                        | 486±19%              | 3447±3%           | 451±16%  | 3674±4%            | 649±16%  | 5161               | 1640    | 2459             | 1022    | 2577            | 958     |
| ORF11                        | 6912±7%                        | 3528±17%             | 5975±7%           | 2528±18% | 5549±3%            | 1875±17% | 13143 <sup>6</sup> | 7982    | 7077             | 4618    | 3892            | 1315    |
| K2                           | 5207±8%                        | 2720±20%             | 4890±10%          | 2211±15% | 6536±7%            | 4331±14% | 26165              | 23292   | 27919            | 27509   | 5957            | 3927    |
| ORF2                         | 2487±6%                        | 2487±6%              | 2679±6%           | 2679±6%  | 2205±7%            | 2205±7%  | 2873               | 2873    | 410              | 410     | 2031            | 2031    |
| K3                           | 4331±5%                        | 4331±5%              | 4220±10%          | 4220±10% | 3446±1%            | 3446±1%  | 6100               | 6100    | 5094             | 5094    | 10844           | 10844   |

<sup>1</sup>RNA transcripts were quantitated using HTSEQ from RNA isolated from triplicate independent infections of LEC, BEC and TIME endothelial cells and single infections of VERO and BCBL-1 cells. The initial TIME cell infection (TIME-K1) is analyzed separately, as discussed in the text.

<sup>2</sup>UCDS features used by HTSEQ to quantitate RNAseq reads; see Table 3

<sup>3</sup>TPM=transcripts per million mapped KSHV reads

<sup>4</sup>Total = total reads mapped to the UCDS for all mono- and poly-cistronic transcripts

<sup>5</sup>Primary = Reads mapping only to the primary transcript of the 5' proximal ORF (see Table 3):

ORF6(primary)=ORF6(total); ORF7(primary)=ORF7(total); ORF8(primary)=ORF8(total)-ORF7(total);

ORF9(primary)=ORF9(total)-ORF8(total); ORF10(primary)=ORF10(total)-ORF9(total); ORF11(primary)=ORF11(total)-ORF10(total);

ORFK2(primary)=ORFK2(total)-ORF2(total); ORF2(primary)=ORF2(total); ORFK3(primary)=ORFK3(total).

<sup>6</sup>Comparatively higher read depths are highlighted in yellow
