# Supplementary material for: Quantitative Analysis of the KSHV Transcriptome Following Primary Infection of Blood and Lymphatic Endothelial Cells
Source: MDPI journal article supplement (doi:10.3390/pathogens6010011), 2017-03-19
Supplement: s1 [file s1]

>ORF57A (28 aa)

MVQAMIDMDIMKGILEGKSSSTTDFSHF

>ORF57B (299 aa)

MVQAMIDMDIMKGILEDSVSSSEFDESRRDETDAPTLEDEQLSEPAEPPADERIRGTQSA  
QGIPPPPLGRIPKKSQGRSQRSEIQFCSPLSRPRSPSPVNRYGKKIKFGTAGQNTRPPPE  
KRPRRRPRDRLQYGRTRGGQCRAAPKRATRRPQVNCQRQDDDVRRQGVSDAVKKLRPAS  
MIIDGESPRFDDSIIPRHGACFNVFIPAPPSHVPEVFTDRDITALIRAGGKDELINKK  
ISAKKIDHLHRQMLSFTSRHNQAYWDCQTPWQSVSRIPCNSRSLINKLPANYTQMK

>ORF57 (455 aa)

MVQAMIDMDIMKGILEDSVSSSEFDESRRDETDAPTLEDEQLSEPAEPPADERIRGTQSA  
QGIPPPPLGRIPKKSQGRSQRSEIQFCSPLSRPRSPSPVNRYGKKIKFGTAGQNTRPPPE  
KRPRRRPRDRLQYGRTRGGQCRAAPKRATRRPQVNCQRQDDDVRRQGVSDAVKKLRPAS  
MIIDGESPRFDDSIIPRHGACFNVFIPAPPSHVPEVFTDRDITALIRAGGKDELINKK  
ISAKKIDHLHRQMLSFTSRHNQAYWVSCRRETAAGGLQTLGAFVEEQMTWAQTVVRHG  
GWFDEKDIDIILDTAIFVCNAFVTRFRLHLSCVFDKQSELALIKQVAYLVAMGNRLVEA  
CNLLGEVKLNFRGGLLAFVLTIPGMQSRRSISARGQELFRTLLEYRPGDVMGLLNIV  
MEHHS�CRNSECAAATRAAMGSAKFNKGLFFYPLS

**Figure S5. ORFs encoded by alternately spliced ORF57 transcripts.** The amino acid sequences of ORFs encoded by the putative alternately spliced transcripts 57.1 (ORF57A: 28 aa), 57.2 (ORF57: 299 aa) and 57.3 (ORF57B: 455 aa) are shown, as described in Fig 10. The distinct exon sequences are color coded.
