# Supplementary material for: Quantitative Analysis of the KSHV Transcriptome Following Primary Infection of Blood and Lymphatic Endothelial Cells
Source: MDPI journal article supplement (doi:10.3390/pathogens6010011), 2017-03-19
Supplement: s1 [file s1]

**S8 Table: Comparison of total and primary transcripts encoding latency region ORFs**

| UCDS <sup>1</sup>  | LEC-K1-3<br>(TPM)  |                       | BEC-K1-3<br>(TPM) |           | TIME-K2,3<br>(TPM) |           | TIME-K1<br>(TPM) |         | BCBL(K)<br>(TPM) |         | VERO-K<br>(TPM) |         |
|--------------------|--------------------|-----------------------|-------------------|-----------|--------------------|-----------|------------------|---------|------------------|---------|-----------------|---------|
|                    | Total <sup>2</sup> | Primary <sup>3</sup>  | Total             | Primary   | Total              | Primary   | Total            | Primary | Total            | Primary | Total           | Primary |
| ORF69              | 3694±14%           | 3694±14%              | 3817±3%           | 3817±3%   | 3765±4%            | 3765±4%   | 2820             | 2820    | 2725             | 2725    | 3403            | 3403    |
| K12A <sup>4</sup>  | 43101±4%           | 43101±4%              | 41547±1%          | 41547±1%  | 32442±2%           | 32442±2%  | 40250            | 40250   | 9743             | 9743    | 26297           | 26297   |
| DR5 <sup>5</sup>   | 136194±6%          | 136194±6%             | 132412±7%         | 132412±7% | 105200±4%          | 105200±4% | 124092           | 124092  | 38833            | 38833   | 69959           | 69959   |
| DR6 <sup>6</sup>   | 14709±7%           | 14709±7%              | 13970±10%         | 13970±10% | 15726±10%          | 15726±10% | 13020            | 13020   | 6473             | 6473    | 6152            | 6152    |
| miR <sup>7</sup>   | 204±31%            | 204±31%               | 142±13%           | 142±13%   | 107±11%            | 107±11%   | 291              | 291     | 169              | 169     | 96              | 96      |
| ORF71              | 4072±13%           | -722±31% <sup>8</sup> | 4127±20%          | -843±30%  | 4852±19%           | -978±21%  | 12581            | -2416   | 3713             | 2663    | 1213            | 338     |
| ORF72              | 4995±15%           | 4795±16%              | 5176±20%          | 4971±22%  | 6013±18%           | 5830±19%  | 15308            | 14997   | 3286             | 1051    | 1369            | 875     |
| K12Aa <sup>9</sup> | 7817±12%           | 7817±12%              | 6656±19%          | 6656±19%  | 5627±16%           | 5627±16%  | 24204            | 24204   | 4716             | 4716    | 1919            | 1919    |
| ORF73              | 200±6%             | 200±6%                | 205±16%           | 205±16%   | 183±11%            | 183±11%   | 311              | 311     | 2235             | 2235    | 494             | 494     |
| K14                | 222±3%             | 222±3%                | 209±7%            | 209±7%    | 192±2%             | 192±2%    | 166              | 166     | 864              | 864     | 327             | 327     |

<sup>1</sup>UCDS feature used by HTSEQ to quantitate RNAseq reads; see Table 3

<sup>2</sup>Total = total reads mapped to the UCDS for all mono- and poly-cistronic transcripts; TPM=transcripts per million

<sup>3</sup>Primary = reads mapping only to the primary transcript of the 5' proximal ORF; due to the complexity of splicing in this region only restricted primary transcripts were quantitated: ORF69(primary)=ORF69(total), K12A(primary)=K12A(total), DR5(primary)=DR5(total), DR6(primary)=DR6(total), miR(primary)=miR(total), ORF71(primary)=ORF71(total)-ORF72(total), ORF72(primary)=ORF72(total)-ORF73(total), K12Aa(primary)=K12Aa(total), ORF73(primary)=ORF73(total), K14(primary)=K14(total)

<sup>4</sup>K12A = UCDS feature corresponding to the K12A Kaposin transcript

<sup>5</sup>DR5 = direct repeat 5 corresponding to the middle of the K12B/C transcript

<sup>6</sup>DR6= direct repeat 6 corresponding to the 5' end of the K12B/C transcript

<sup>7</sup>miR = region containing the microRNA genes –transcripts mapping to this region have not been processed to yield the mature micro RNAs

<sup>8</sup>Negative values (red) for primary transcripts indicate the absence of a primary monocistronic transcript for ORF71 and the presence of an ORF72 transcript upstream that terminates before ORF71.

<sup>9</sup>K12Aa = UCDS feature corresponding to the 5' exon immediately upstream of the ORF72 CDS
