# Supplementary material for: Quantitative Analysis of the KSHV Transcriptome Following Primary Infection of Blood and Lymphatic Endothelial Cells
Source: MDPI journal article supplement (doi:10.3390/pathogens6010011), 2017-03-19
Supplement: s1 [file s1]

**Table S15: Overexpressed KSHV genes<sup>1</sup>**

| TIME-K1 | BCBL-1(K) | VERO-K | LEC-K1 | LEC-K2 | LEC-K3 | BEC-K1 | BEC-K2 | BEC-K3 |
|---------|-----------|--------|--------|--------|--------|--------|--------|--------|
| 6       | K1        | K1     |        | LIR1   | LIR1   | 28     | K4.2A  | K4.1   |
| 7       | 4B        | 4A     |        | K5     | DR1    | 29B    | 23     | 31     |
| 9       | 10        | 4B     |        | miR    | 68     | 31     | 28     | 67     |
| 10      | 11        | K3     |        |        |        | 67     | 29B    |        |
| 11      | K2        | 70     |        |        |        |        |        |        |
| K2      | DR1       | K4     |        |        |        |        |        |        |
| K4.1    | DR2       | K4.1   |        |        |        |        |        |        |
| 32      | OLAP      | K4.2   |        |        |        |        |        |        |
| 29A     | K6        | DR1    |        |        |        |        |        |        |
| 34      | PAN       | DR2    |        |        |        |        |        |        |
| 35      | 32        | OLAP   |        |        |        |        |        |        |
| 36      | 38        | K5     |        |        |        |        |        |        |
| 37      | 45        | K6     |        |        |        |        |        |        |
| 41      | 49        | K7     |        |        |        |        |        |        |
| 46      | 50        | 23     |        |        |        |        |        |        |
| 47      | K8a       | 56     |        |        |        |        |        |        |
| 50      | 54        | 58     |        |        |        |        |        |        |
| K8a     | K9        | 60     |        |        |        |        |        |        |
| 54      | 71        | 64     |        |        |        |        |        |        |
| 56      | 73        | 66     |        |        |        |        |        |        |
| 57      | K14       | 74     |        |        |        |        |        |        |
| 61      |           |        |        |        |        |        |        |        |
| miR     |           |        |        |        |        |        |        |        |
| 72      |           |        |        |        |        |        |        |        |
| K12Aa   |           |        |        |        |        |        |        |        |
| 74      |           |        |        |        |        |        |        |        |
| K15a    |           |        |        |        |        |        |        |        |

<sup>1</sup>Overexpressed KSHV genes were defined as those having expression levels in one infected cell culture that were outside of the 95% confidence level and 1.5 fold or greater than the mean of the expression levels in the other infected cell cultures. The UCDS gene features corresponding to the different KSHV genes are shown.
