# Supplementary material for: Quantitative Analysis of the KSHV Transcriptome Following Primary Infection of Blood and Lymphatic Endothelial Cells
Source: MDPI journal article supplement (doi:10.3390/pathogens6010011), 2017-03-19
Supplement: s1 [file s1]

**S5 Table: Comparison of total and primary transcripts encoding ORFs 44-50**

|       | LEC-K1-3           |                      | BEC-K1-3 |          | TIME-K2,3 |          | TIME-K1 |         | BCBL(K) |         | VERO-K |         |
|-------|--------------------|----------------------|----------|----------|-----------|----------|---------|---------|---------|---------|--------|---------|
|       | Total <sup>1</sup> | Primary <sup>2</sup> | Total    | Primary  | Total     | Primary  | Total   | Primary | Total   | Primary | Total  | Primary |
| ORF44 | 531±11%            | 531±11%              | 556±11%  | 556±11%  | 477±10%   | 477±10%  | 628     | 628     | 377     | 377     | 400    | 400     |
| ORF45 | 5719±5%            | 2119±6%              | 6020±7%  | 2240±7%  | 5970±6%   | 2240±18% | 6131    | 1382    | 6280    | 4059    | 4212   | 1681    |
| ORF46 | 3600±8%            | 1149±19%             | 3780±3%  | 1179±3%  | 3730±2%   | 1004±7%  | 4749    | 1553    | 2220    | -245    | 2530   | 850     |
| ORF47 | 2451±4%            | 1202±6%              | 2601±7%  | 1232±7%  | 2726±5%   | 1460±28% | 3196    | 1806    | 2465    | 1600    | 1681   | 570     |
| ORF48 | 1249±7%            | 1249±7%              | 1369±15% | 1369±15% | 1266±7%   | 1266±22% | 1391    | 1391    | 865     | 865     | 1111   | 1111    |
| ORF49 | 1178±8%            | 1178±8%              | 1269±16% | 1269±16% | 1207±7%   | 1207±21% | 1412    | 1412    | 2177    | 2177    | 884    | 884     |
| ORF50 | 1479±8%            | 1479±8%              | 1730±6%  | 1730±6%  | 1516±7%   | 1516±15% | 2477    | 2477    | 2535    | 2535    | 1470   | 1470    |

<sup>1</sup>Total = total reads (TPM) mapped to the UCDS for all mono- and polycistronic transcripts

<sup>2</sup>Primary = Reads (TPM) mapping only to the primary transcript of the 5' proximal ORF (as described in Table 3);

ORF44(primary)=ORF44(total); ORF45(primary)=ORF45(total)-ORF46(total); ORF46(primary)=ORF46(total)-ORF47(total);

ORF47(primary)=ORF47(total)-ORF48(total); ORF48(primary)=ORF48(total); ORF49(primary)=ORF49(total).
