# Supplementary material for: Quantitative Analysis of the KSHV Transcriptome Following Primary Infection of Blood and Lymphatic Endothelial Cells
Source: MDPI journal article supplement (doi:10.3390/pathogens6010011), 2017-03-19
Supplement: s1 [file s1]

**S2 Table: Comparison of total and primary transcripts encoding ORFs in the PAN region<sup>1</sup>**

| UCDS Feature <sup>2</sup> | LEC-K1-3 (TPM) <sup>3</sup> | BEC-K1-3 (TPM) | TIME-K2,K3 (TPM) | TIME-K1 (TPM) | BCBL(K) (TPM) | VERO-K (TPM) |
|---------------------------|-----------------------------|----------------|------------------|---------------|---------------|--------------|
| K3                        | 4331±5%                     | 4220±10%       | 3446±0%          | 6100          | 5094          | 10844        |
| ORF70                     | 3407±6%                     | 3261±13%       | 2751±0%          | 5084          | 2582          | 8239         |
| K4                        | 20088±4%                    | 22877±2%       | 16272±1%         | 20912         | 26916         | 63647        |
| K4.1 <sup>4</sup>         | 555±78% <sup>5</sup>        | 781±44%        | 877±34%          | 1098          | 15            | 1483         |
| K4.2A <sup>6</sup>        | 6372±10%                    | 7896±12%       | 6922±16%         | 3128          | 1189          | 2534         |
| K4.2 <sup>7</sup>         | 149±16%                     | 163±6%         | 102±22%          | 169           | 88            | 271          |
| LIR1                      | 117±32%                     | 87±13%         | 59±28%           | 114           | 76            | 73           |
| DR1                       | 3032±40%                    | 1890±16%       | 837±8%           | 722           | 6053          | 6150         |
| DR2                       | 1229±38%                    | 737±10%        | 396±5%           | 190           | 4463          | 2435         |
| OLAP                      | 3108±35%                    | 1884±8%        | 884±7%           | 608           | 14789         | 7759         |
| K5                        | 9145±21%                    | 6549±13%       | 4463±11%         | 10723         | 7833          | 11963        |
| K6                        | 4537±23%                    | 3848±10%       | 2271±4%          | 3322          | 13459         | 7630         |
| K7 <sup>8</sup>           | 2567±26%                    | 1968±7%        | 1075±2%          | 622           | 2798          | 5694         |
| PAN                       | 429503±5%                   | 435022±3%      | 465811±1%        | 327965        | 650560        | 540860       |
| ORF16                     | 586±13%                     | 549±9%         | 506±10%          | 310           | 471           | 732          |
| ORF17.5 <sup>9</sup>      | 11554±2%                    | 12777±5%       | 12659±2%         | 6274          | 7724          | 6473         |

<sup>1</sup>Primary RNA transcripts were quantitated using HTSEQ from RNA isolated from triplicate Independent infections of LEC, BEC and TIME endothelial cells and single infections of VERO and BCBL-1 cells, as described in Table 3. The initial TIME cell infection (TIME-K1) is analyzed separately, as discussed in the text.

<sup>2</sup>UCDS features used by HTSEQ to quantitate RNAseq reads; see Table 3

<sup>3</sup>TPM=transcripts per million mapped KSHV reads

<sup>4</sup>K4.1 primary transcript quantitation= K4.1 UCDS TPM (total) - K4.2A UCDS TPM (total) (see Table 3)

<sup>5</sup>TPM values with standard deviations above 15% are highlighted in yellow

<sup>6</sup>K4.2A = C-terminal region of K4.2 ORF common to short K4.2A and long K4.2 transcripts;

K4.2A primary transcript quantitation=K4.2A UCDS TPM (total) – K4.2 UCDS TPM (total) (see Table 3)

<sup>7</sup>K4.2 = N-terminal region of K4.2 ORF only in long K4.2 transcript

<sup>8</sup>The K7 UCDS feature corresponds to the 5' untranslated region of the K7 transcript upstream of the PAN RNA.

<sup>9</sup>ORF17.5 = C-terminal region of ORF17 common to short ORF17.5 and long ORF17 transcripts;

ORF17.5 primary transcript quantitation = ORF17.5 UCDS TPM (total) - ORF17 UCDS TPM (total)(see Table 3)
