# Supplementary material for: Quantitative Analysis of the KSHV Transcriptome Following Primary Infection of Blood and Lymphatic Endothelial Cells
Source: MDPI journal article supplement (doi:10.3390/pathogens6010011), 2017-03-19
Supplement: s1 [file s1]

**S3 Table: UCDS quantitation of overlapping ORF17/ORF17.5 primary transcripts<sup>1</sup>**

| UCDS<br>Feature <sup>2</sup> | LEC-K1-3<br>(TPM) <sup>3</sup> | BEC-K1-3<br>(TPM) | TIME-K2,3<br>(TPM) | TIME-K1<br>(TPM) | BCBL(K)<br>(TPM) | VERO-K<br>(TPM) |
|------------------------------|--------------------------------|-------------------|--------------------|------------------|------------------|-----------------|
|                              | Primary <sup>4</sup>           | Primary           | Primary            | Primary          | Primary          | Primary         |
| ORF16                        | 586±13%                        | 549±9%            | 506±9%             | 310              | 471              | 732             |
| ORF17.5                      | 11554±2%                       | 12777±5%          | 12659±1%           | 6274             | 7724             | 6473            |
| ORF17                        | 1994±2%                        | 2069±7%           | 1947±5%            | 1462             | 1276             | 1892            |
| ORF18                        | 1284±7%                        | 1328±6%           | 1380±7%            | 1078             | 988              | 1336            |

<sup>1</sup>RNA transcripts were quantitated using HTSEQ from RNA isolated from triplicate independent infections of LEC, BEC and TIME endothelial cells and single infections of VERO and BCBL-1 cells. The initial TIME cell infection (TIME-K1) is analyzed separately, as discussed in the text.

<sup>2</sup>UCDS features used by HTSEQ to quantitate RNAseq reads; see Table 3

<sup>3</sup>TPM=transcripts per million mapped KSHV reads

<sup>4</sup>Primary = Reads mapping only to the primary transcript of the 5' proximal ORF (see Table 3): ORF16(primary)=ORF16(total), ORF17.5(primary)=ORF17.5(total)-ORF17(total), ORF17(primary)=ORF17(total), ORF18(primary)=ORF18(total)
