# Supplementary material for: Quantitative Analysis of the KSHV Transcriptome Following Primary Infection of Blood and Lymphatic Endothelial Cells
Source: MDPI journal article supplement (doi:10.3390/pathogens6010011), 2017-03-19
Supplement: s1 [file s1]

**Table S11: Functional classification of KSHV genes<sup>1</sup>**

| Env/<br>Memb | Capsid | Tegument | Virion | Regulatory | Replication | Immuno-<br>Modulatory | Mitotic | Other |
|--------------|--------|----------|--------|------------|-------------|-----------------------|---------|-------|
| 8            | 17.5   | 11       | 17     | PAN        | 6           | K1                    | K7      | OLAP  |
| K4.2A        | 25     | 19       | 20     | 18         | 7           | 4A                    | 16      | DR1   |
| 22           | 26     | 21       | 24     | 30         | 9           | 4B                    | K12A    | DR2   |
| 23           | 43     | 32       | 29B    | 31         | 2           | 10                    | DR5     |       |
| 27           | 62     | 33       | 29A    | 34         | 70          | K2                    | DR6     |       |
| 28           | 65     | 52       | 38     | 35         | 36          | K3                    | 71      |       |
| 39           | 66     | 63       | 67A    | 37         | 40A         | K4                    | 72      |       |
| 47           |        | 64       | 69     | 49         | 41          | K4.1                  | K12Aa   |       |
| 48           |        |          |        | 50         | 42          | K4.2                  | 73      |       |
| K8.1         |        |          |        | K8a        | 44          | K5                    | K15a    |       |
| 53           |        |          |        | 55         | 46          | K6                    |         |       |
| 58           |        |          |        | 57         | 54          | 45                    |         |       |
| 68           |        |          |        |            | 56          | K9                    |         |       |
|              |        |          |        |            | 59          | K10                   |         |       |
|              |        |          |        |            | 60          | K10.5                 |         |       |
|              |        |          |        |            | 61          | K11                   |         |       |
|              |        |          |        |            |             | K14                   |         |       |
|              |        |          |        |            |             | 74                    |         |       |

<sup>1</sup>KSHV genes, as represented by their related UCDS feature name, were classified based on their proposed function or mechanism of action from the published literature.
