# Supplementary material for: Quantitative Analysis of the KSHV Transcriptome Following Primary Infection of Blood and Lymphatic Endothelial Cells
Source: MDPI journal article supplement (doi:10.3390/pathogens6010011), 2017-03-19
Supplement: s1 [file s1]

**Table S16: Significance of enrichment of overexpressed genes in regulatory modules<sup>1</sup>**

| Infected Cell | Cluster 1                         | Cluster 2            | Cluster 3            | Cluster 4            | Cluster 5            |
|---------------|-----------------------------------|----------------------|----------------------|----------------------|----------------------|
| BCBL-1(K)     | P<0.0001<br>(OR 347) <sup>2</sup> | P=0.06662            | P=1                  | P= 0.0359            | P<0.0001             |
| VERO-K        | P=0.5169                          | P<0.0001<br>(OR 128) | P=0.0367             | P=0.729              | P<0.0001             |
| TIME-K1       | P=0.772                           | P=0.3378             | P<0.0001<br>(OR 82)  | P=0.3451<br>(OR 2.0) | P<0.0001             |
| TIME-K2       | P=0.1178                          | P=0.2041             | P=0.6873             | P=0.2083             | P<0.0001<br>(OR 31)  |
| TIME-K3       | P=1                               | P=1                  | P=0.3013<br>(OR 5.3) | P=0.284<br>(OR 5.7)  | P=0.5361             |
| BEC-K1        | P=1                               | P=1                  | P=1                  | P=1                  | P=0.0145             |
| BEC-K2        | P=1                               | P=1                  | P=1                  | P=0.4913<br>(OR 1.9) | P=0.1286<br>(OR 5.7) |
| BEC-K3        | P=1                               | P=1                  | P=1                  | P=1                  | P=1                  |
| LEC-K1        | NA                                | NA                   | NA                   | NA                   | NA                   |
| LEC-K2        | P=1                               | P=0.2666<br>(OR 6.2) | P=0.3013<br>(OR 5.3) | P=1                  | P=0.5361             |
| LEC-K3        | P=0.4598<br>(OR 2.3)              | P=1                  | P=0.4177<br>(OR 2.6) | P=1                  | P=1                  |

<sup>1</sup> Fisher's exact test was used to calculate the significance of enrichment (see Figure 17).

Overexpressed genes are defined as those genes whose primary transcript levels (TPM) fall outside of the 95% confidence level and are 1.5 fold or greater than the mean of the other transcript levels.

<sup>2</sup>OR = Odds Ratios equal to or greater than 2.0 are shown
