# Supplementary material for: Quantitative Analysis of the KSHV Transcriptome Following Primary Infection of Blood and Lymphatic Endothelial Cells
Source: MDPI journal article supplement (doi:10.3390/pathogens6010011), 2017-03-19
Supplement: s1 [file s1]

**S4 Table: Comparison of total and primary transcripts encoding ORFs 49-52<sup>1</sup>**

| UCDS<br>Feature <sup>2</sup> | LEC-K1-3<br>(TPM) <sup>3</sup> |                      | BEC-K1-3<br>(TPM) |           | TIME-K2-3<br>(TPM) |          | TIME-K1<br>(TPM) |         | BCBL(K)<br>(TPM) |         | VERO-K<br>(TPM) |         |
|------------------------------|--------------------------------|----------------------|-------------------|-----------|--------------------|----------|------------------|---------|------------------|---------|-----------------|---------|
|                              | Total <sup>4</sup>             | Primary <sup>5</sup> | Total             | Primary   | Total              | Primary  | Total            | Primary | Total            | Primary | Total           | Primary |
| ORF49                        | 1178±8%                        | 1178±8%              | 1269±16%          | 1269±16%  | 1207±21%           | 1207±12% | 1412             | 1412    | 2177             | 2177    | 884             | 884     |
| ORF50                        | 1479±8%                        | 1479±8%              | 1730±6%           | 1730±6%   | 1516±15%           | 1516±15% | 2477             | 2477    | 2535             | 2535    | 1470            | 1470    |
| ORFK8                        | 6295±14%                       | 4816±20%             | 6596±18%          | 4866±25%  | 7841±6%            | 6324±11% | 24601            | 22124   | 12701            | 10166   | 2753            | 1283    |
| ORFK8.1                      | 30862±8%                       | 30862±8%             | 31696±13%         | 31696±13% | 37000±9%           | 37000±9% | 14859            | 14859   | 4686             | 4686    | 5401            | 5401    |
| ORF52                        | 6636±3%                        | 6636±3%              | 6730±12%          | 6730±12%  | 6854±10%           | 6854±10% | 3058             | 3058    | 6246             | 6246    | 4379            | 4379    |

<sup>1</sup>RNA transcripts were quantitated using HTSEQ from RNA isolated from triplicate independent infections of LEC, BEC and TIME endothelial cells and single infections of VERO and BCBL-1 cells. The initial TIME cell infection (TIME-K1) is analyzed separately, as discussed in the text.

<sup>2</sup>UCDS features used by HTSEQ to quantitate RNAseq reads; see Table 3

<sup>3</sup>TPM=transcripts per million mapped KSHV reads

<sup>4</sup>Total = total reads mapped to the UCDS features for all mono- and poly-cistronic transcripts

<sup>5</sup>Primary = Reads mapping only to the primary transcript of the 5' proximal ORF; ORF49(primary)=ORF49(total); ORF50(primary)=ORF50(total); ORFK8(primary)=ORFK8(total)-ORF50(total); ORFK8.1(primary)=ORFK8.1(total); ORF52(primary)=ORF52(total)
