# Supplementary material for: Quantitative Analysis of the KSHV Transcriptome Following Primary Infection of Blood and Lymphatic Endothelial Cells
Source: MDPI journal article supplement (doi:10.3390/pathogens6010011), 2017-03-19
Supplement: s1 [file s1]

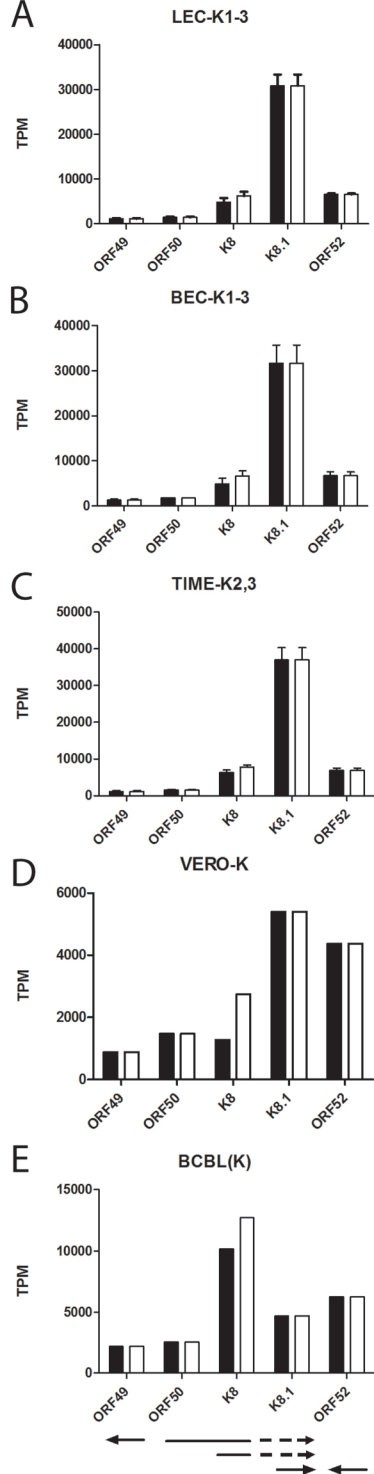

**Figure S4. Comparison of reads mapping to the primary transcripts of ORFs 49-52.** The total number of reads mapping to the UCDS feature for each ORF were quantitated by HTSEQ and normalized (TPM) with the average and standard deviation determined for the replicate infections (open bars). The number of reads mapping only to the primary transcript, in which the designated ORF is 5' proximal were quantitated by subtraction of the number of reads attributed to transcripts in which the designated ORF is distal in a polycistronic transcript (black bars; see Table 3 and Table S4). A) BEC-K1-3; B) LEC-K1-3; C) TIME-K2,3; D) VERO-K; E) BCBL(K). The proposed pattern of transcription is indicated at the bottom.
