# Supplementary material for: Quantitative Analysis of the KSHV Transcriptome Following Primary Infection of Blood and Lymphatic Endothelial Cells
Source: MDPI journal article supplement (doi:10.3390/pathogens6010011), 2017-03-19
Supplement: s1 [file s1]

**S13 Table: KSHV gene promoter categories<sup>1</sup>**

| TATTTAA | TATTAAA | TATATA | TATAA | TATA | TAAAT | Undefined |
|---------|---------|--------|-------|------|-------|-----------|
| 8       | 4A      | 2      | OLAP  | 6    | K1    | 18        |
| K2      | K4.2A   | 16     | K6    | 11   | 7     | 4B        |
| K4.2    | 22      | 24     | 25    | 70   | 9     | 23        |
| K5      | 26      | 28     | 30    | K3   | 20    | 31        |
| 17.5    | 29B     | 35     | 46    | 55   | 21    | 34        |
| 17      | 33      | 42     | 49    | 56   | 29A   | 44        |
| 19      | 38      | 47     | 52    | K11  | 50    | 45        |
| 27      | K8.1    | 53     | K8a   | 66   | K4    | 58        |
| 32      | 64      | 54     | K10   | 71   |       | 60        |
| 39      | 65      | 57     | 69    |      |       | K10.5     |
| 40A     | 74      | K9     | K14   |      |       | DR1       |
| 48      |         | 61     | 73    |      |       | DR2       |
| 52      |         |        |       |      |       | DR5       |
| 59      |         |        |       |      |       | DR6       |
| 62      |         |        |       |      |       | K12A      |
| 63      |         |        |       |      |       | K12Aa     |
| 67      |         |        |       |      |       | K4.1      |
| 67A     |         |        |       |      |       | K7        |
| K15a    |         |        |       |      |       | LIR1      |
| 36      |         |        |       |      |       | mIR       |
| 41      |         |        |       |      |       | PAN       |
| 43      |         |        |       |      |       |           |
| 68      |         |        |       |      |       |           |
| 75      |         |        |       |      |       |           |
| 37      |         |        |       |      |       |           |
| 72      |         |        |       |      |       |           |
| K4.1    |         |        |       |      |       |           |

<sup>1</sup>Promoter categories were derived from the promoter elements listed in Table 2
