# Supplementary material for: Quantitative Analysis of the KSHV Transcriptome Following Primary Infection of Blood and Lymphatic Endothelial Cells
Source: MDPI journal article supplement (doi:10.3390/pathogens6010011), 2017-03-19
Supplement: s1 [file s1]

**S7 Table: Comparison of total and primary transcripts encoding ORFs 58-62**

|       | LEC-K1-3 (TPM)     |                        | BEC-K1-3 (TPM) |           | TIME-K2,3 (TPM) |           | TIME-K1 (TPM) |         | BCBL(K) (TPM) |         | VERO-K (TPM) |         |
|-------|--------------------|------------------------|----------------|-----------|-----------------|-----------|---------------|---------|---------------|---------|--------------|---------|
|       | Total <sup>1</sup> | Primary <sup>2</sup>   | Total          | Primary   | Total           | Primary   | Total         | Primary | Total         | Primary | Total        | Primary |
| ORF58 | 20331±6%           | -1257±52% <sup>3</sup> | 20541±7%       | -1130±38% | 23620±4%        | -1794±19% | 27736         | -935    | 11817         | -3061   | 26270        | 794     |
| ORF59 | 21588±8%           | 13443±9%               | 21670±7%       | 13687±8%  | 25414±5%        | 15166±7%  | 28672         | 15125   | 14879         | 12165   | 25476        | 17502   |
| ORF60 | 8145±7%            | 2015±10%               | 7983±6%        | 1978±10%  | 10248±2%        | 2640±4%   | 13547         | 2968    | 2714          | 1604    | 7974         | 4233    |
| ORF61 | 6130±7%            | 6130±7%                | 6006±5%        | 6006±5%   | 7607±1%         | 7607±1%   | 10579         | 10579   | 1110          | 1110    | 3741         | 3741    |
| ORF62 | 2494±8%            | 2494±8%                | 2413±6%        | 2413±6%   | 3248±5%         | 3248±5%   | 1796          | 1796    | 648           | 648     | 792          | 792     |

<sup>1</sup>Total = total reads mapped to the UCDS for all mono- and poly-cistronic transcripts; TPM= transcripts per million

<sup>2</sup>Primary = Reads mapping only to the primary transcript of the 5' proximal ORF: ORF58(primary)=ORF58(total)-ORF59(total); ORF59(primary)=ORF59(total)-ORF60(total); ORF60(primary)=ORF60(total)-ORF61(total); ORF61(primary)=ORF61(total); ORF62(primary)=ORF62(total).

<sup>3</sup>Negative values (red) for primary transcripts indicates the absence of a primary monocistronic transcript for ORF58 and the presence of an ORF59 transcript upstream that terminates before ORF58.
