# Supplementary material for: Quantitative Analysis of the KSHV Transcriptome Following Primary Infection of Blood and Lymphatic Endothelial Cells
Source: MDPI journal article supplement (doi:10.3390/pathogens6010011), 2017-03-19
Supplement: s1 [file s1]

**S12 Table: Significance of functional enrichment in gene regulatory modules<sup>1</sup>**

| Function                    | Cluster 1             | Cluster 2            | Cluster 3            | Cluster 4             | Cluster 5                         | Env/Cap subcluster    |
|-----------------------------|-----------------------|----------------------|----------------------|-----------------------|-----------------------------------|-----------------------|
| Envelope/<br>Membrane       | P=0.1178              | P=0.6855             | P=0.6873             | P=1                   | P=0.0113<br>(OR 5.0) <sup>2</sup> | P=0.01667<br>(OR 6.9) |
| Capsid                      | P=0.3432              | P=1                  | P=0.595              | P=1                   | P=0.0937<br>(OR 5.0)              | P=0.0011<br>(OR 21.2) |
| Tegument                    | P=0.2002              | P=1                  | P=0.6652             | P=0.3523              | P=0.0318<br>(OR 4.9)              | P=1                   |
| Virion<br>assembly/egress   | P=1                   | P=0.597              | P=0.3464             | P=0.6042              | P=0.1295<br>(OR 3.3)              | P=1                   |
| Transcription<br>Regulation | P=0.2248              | P=0.2056             | P=0.1042             | P=0.6856              | P=0.5293                          | P=0.5954              |
| Replication                 | P=0.2907              | P=0.6953             | P=0.2898             | P=0.0003<br>(OR 10.3) | P=0.0005                          | P=0.3477              |
|                             |                       |                      | P=0.0001<br>(OR 9.6) |                       |                                   |                       |
| Immune<br>modulation        | P=0.0140<br>(OR 4.4)  | P=0.0145<br>(OR 4.9) | P=0.0663             | P=0.4574              | P=0.1024                          | P=0.352               |
|                             | P<0.0001<br>(OR 10.3) |                      |                      |                       |                                   |                       |
| Mitogenesis/<br>Cell cycle  | P=1                   | P=0.632              | P=0.2071             | P=0.3523              | P=1                               | P=0.5915              |

<sup>1</sup> Fisher's exact test for correlation between functional attributes of genes and gene regulatory modules identified in Figure 17.

<sup>2</sup>OR = Odds Ratio greater than 2.0 are shown
