# Supplementary material for: Quantitative Analysis of the KSHV Transcriptome Following Primary Infection of Blood and Lymphatic Endothelial Cells
Source: MDPI journal article supplement (doi:10.3390/pathogens6010011), 2017-03-19
Supplement: s1 [file s1]

**S10 Table: Modules of co-regulated genes**

| Cluster1 <sup>1</sup> | Cluster2 <sup>1</sup> | Cluster3 <sup>1</sup> | Cluster4 <sup>1</sup> | Cluster5 <sup>1</sup> | ENV/CAP 5 subcluster <sup>1</sup> |
|-----------------------|-----------------------|-----------------------|-----------------------|-----------------------|-----------------------------------|
| K14                   | K7                    | 47                    | K4.1                  | 27                    | 8                                 |
| 73                    | 4A                    | 32                    | 59                    | 52                    | 17.5                              |
| 71                    | 16                    | 41                    | 23                    | 69                    | 19                                |
| K9                    | 58                    | K8a                   | 20                    | DR6                   | 65                                |
| OLAP                  | 66                    | 11                    | 61                    | 62                    | K8.1                              |
| DR2                   | K4                    | mIR                   | 40A                   | 63                    | K4.2A                             |
| K6                    | K3                    | LIR1                  | 7                     | DR5                   | 26                                |
| PAN                   | 60                    | 72                    | 34                    | K12A                  | 39                                |
| 4B                    | 70                    | K12Aa                 | 42                    | 33                    | 25                                |
| DR1                   | 64                    | 37                    | 29A                   | 30                    |                                   |
| K1                    | K4.2                  | 57                    | 2                     | 53                    |                                   |
| 55                    | K5                    | 6                     | 46                    | K10.5                 |                                   |
| 38                    | 74                    | 36                    | 44                    | K11                   |                                   |
| 49                    | 56                    | 9                     | 43                    | 8                     |                                   |
| 45                    |                       | 35                    | 48                    | 17.5                  |                                   |
| K2                    |                       | K15a                  |                       | 19                    |                                   |
| 50                    |                       |                       |                       | 65                    |                                   |
| 10                    |                       |                       |                       | K8.1                  |                                   |
| 54                    |                       |                       |                       | K4.2A                 |                                   |
|                       |                       |                       |                       | 26                    |                                   |
|                       |                       |                       |                       | 39                    |                                   |
|                       |                       |                       |                       | 25                    |                                   |
|                       |                       |                       |                       | 68                    |                                   |
|                       |                       |                       |                       | 21                    |                                   |
|                       |                       |                       |                       | K10                   |                                   |
|                       |                       |                       |                       | 18                    |                                   |
|                       |                       |                       |                       | 67                    |                                   |
|                       |                       |                       |                       | 24                    |                                   |
|                       |                       |                       |                       | 22                    |                                   |
|                       |                       |                       |                       | 17                    |                                   |
|                       |                       |                       |                       | 31                    |                                   |
|                       |                       |                       |                       | 67A                   |                                   |
|                       |                       |                       |                       | 75                    |                                   |
|                       |                       |                       |                       | 28                    |                                   |
|                       |                       |                       |                       | 29B                   |                                   |

<sup>1</sup> Gene clusters identified by hierarchical clustering of gene-gene correlations, as shown in Figure 17.
